# Supplementary material for: Expediting hole transfer kinetics through surface state modulation of a Ru–FeOOH and FeNi(OH)x dual-layer cocatalyst coated Zr–Fe2O3 photoanode for boosting photoelectrochemical water splitting
Source: Royal Society of Chemistry journal article supplement (doi:10.1039/d3ta07823j), 2024-01-01
Supplement: d3ta07823j1.pdf [file d3ta07823j1.pdf]

## Supporting Information

### **Expediting hole transfer kinetics through surface state modulation of a Ru-FeOOH and FeNi(OH)<sub>x</sub> dual-layer cocatalyst coated Zr-Fe<sub>2</sub>O<sub>3</sub> photoanode for boosting photoelectrochemical water splitting**

Periyasamy Anushkaran,<sup>a</sup> Weon-Sik Chae,<sup>b</sup> Jungho Ryu,<sup>\*c</sup> Sun Hee Choi<sup>\*d</sup> and Jum Suk Jang<sup>\*ae</sup>

<sup>a</sup>Department of Integrative Environmental Biotechnology, College of Environmental and Bioresource Sciences, Jeonbuk National University, Iksan, 54596, Republic of Korea

<sup>b</sup>Daegu Center, Korea Basic Science Institute, Daegu 41566, Republic of Korea

<sup>c</sup>Mineral Resources Division, Korea Institute of Geoscience and Mineral Resources (KIGAM), Gwahak-ro 124, Yuseong-gu, Daejeon 34132, Republic of Korea

<sup>d</sup>Pohang Accelerator Laboratory (PAL), Pohang University of Science and Technology (POSTECH), Pohang 37673, Republic of Korea

<sup>e</sup>Division of Biotechnology, College of Environmental and Bioresource Sciences, Jeonbuk National University, Iksan 54896, Republic of Korea

\*Corresponding authors.

E-mail address: jryu@kigam.re.kr (J. Ryu), shchoi@postech.ac.kr (S. H. Choi), jangjs75@jbnu.ac.kr (J. S. Jang)

## Characterizations

X-ray diffraction (XRD) measurements were carried out for the structural analysis of the grown photoanodes at the Center for University-wide Research Facilities (CURF) at Jeonbuk National University. This analysis was performed using PANalytical X'pert Pro MPD diffractometer equipped with a Cu K $\alpha$  radiation source (wavelength K $\alpha$ 1 = 1.540598 Å and K $\alpha$ 2 = 1.544426 Å) operated at 40 kV and 30 mA at a scan rate of 0.00835° 2 $\theta$  s<sup>-1</sup> with a 2 $\theta$  angle of 20–80°. The morphology of all samples was observed using high-resolution field-emission scanning electron microscopy (HR FE-SEM, Hitachi SU8230, Korean Basic Science Institute) and high-resolution transmission electron microscopy (HR-TEM, CURF) observations were carried out. X-ray photoelectron spectroscopy (XPS) measurements were performed on a PHI Quantera II spectrometer using a monochromatic AlK $\alpha$  X-ray source (Kongju National University) and the binding energy was calibrated by the adventitious carbon peak of C 1s at 284.8 eV.

The TR-PL study was carried out using a confocal microscope (MicroTime-200, Picoquant, Germany) with a 40 $\times$  objective. The lifetime measurements were performed at the Korea Basic Science Institute (KBSI), Daegu Center, Korea. A single-mode pulsed diode laser (470 nm with a pulse width of ~30 ps and an average power of ~75  $\mu$ W) was used as an excitation source. A dichroic mirror (490 DCXR, AHF), a long-pass filter (HQ500lp, AHF), a 150  $\mu$ m pinhole, and a single photon avalanche diode (PDM series, MPD) were used to collect emission from the samples. A time-correlated single-photon counting system (PicoHarp300, PicoQuant GmbH, Germany) was used to count emission photons. PL lifetime images consisted of 200 $\times$ 200 pixels were recorded using the time-tagged time-resolved (TTTR) data acquisition method. Exponential fitting for the obtained emission decays with a time-resolution of 8 ps was accomplished using the Symphotime-64 software (Ver. 2.2). Steady-state PL spectrum was recorded in the spectral range of 490–730 nm under 470 nm laser excitation by guiding emission photons through an optical fiber to the external spectrophotometer (F-7000, Hitachi, Japan). The time-resolved PL intensity is defined by,

$$I(t) = \sum A_i e^{-t/\tau_i} \quad (S1)$$

where,  $I(t)$  is the PL intensity as a function of time,  $A$  is the amplitude,  $\tau$  is the PL lifetime, and  $i$  is the subcomponent number of lifetime (1–3). The intensity-weighted average lifetime  $\langle \tau \rangle$  is defined as follows:<sup>1</sup>

$$\langle \tau \rangle = \frac{\sum A_i \tau_i^2}{\sum A_i \tau_i} \quad (\text{S2})$$

### Photoelectrochemical (PEC) measurements

PEC measurements were performed with an Ivium CompactStat potentiostat (Ivium Instruments, The Netherlands) in a three-electrode electrochemical cell using the prepared  $\alpha$ - $\text{Fe}_2\text{O}_3$  as the working electrode, Pt wire as the counter electrode and Hg/HgO as the reference electrode. An aqueous solution of 1 M NaOH (pH = 13.6) was used as the electrolyte. Current density-potential characteristics were measured by an Ivium CompactStat potentiostat with illumination using a solar simulator with the standard global solar light (AM 1.5 G, 100  $\text{mW}/\text{cm}^2$ ). The potential was calculated against the reversible hydrogen electrode (RHE) by using the following Nernst equation:

$$E_{\text{RHE}} = E_{\text{Hg}/\text{HgO}} + 0.059\text{pH} + E_{\text{Hg}/\text{HgO}}^0 \quad (\text{S3})$$

( $E_{\text{Hg}/\text{HgO}}^0 = 0.095 \text{ V}$  at  $25^\circ\text{C}$ )

Current density-potential curves were obtained from 0.3 to 1.7 V vs. RHE with a scan rate of 50  $\text{mV s}^{-1}$ . The Nyquist plots calculated from electrochemical impedance spectroscopy (EIS) were measured at 1.23 V vs. RHE over the frequency range from 3000 kHz to 0.5 Hz under a 1-sun illumination condition. The incident photon-to-current efficiency (IPCE) is measured using CS130 monochromator (Mmac-200, spectro) with 300 W Xe arc lamp at 1.23 V vs. RHE. The IPCE of as-prepared photoanodes was calculated using the following equation:<sup>2</sup>

$$\text{IPCE} (\%) = (1240 \times J_{\text{photo}}) / (I_{\text{inc}} \times \lambda) \times 100 \% \quad (\text{S4})$$

where,  $J_{\text{photo}}$  is the measured photocurrent density at each corresponding wavelength ( $\text{mA}/\text{cm}^2$ ) at 1.23 V vs. RHE,  $I_{\text{inc}}$  is the incident monochromatic light power density of each corresponding wavelength ( $\text{mW}/\text{cm}^2$ ) and  $\lambda$  is the wavelength of monochromatic light (nm) respectively. The absorbed photon-to-current efficiency (APCE) is calculated using the following equation:<sup>3</sup>

$$\text{APCE} = \text{IPCE} / \text{LHE} \quad (\text{S5})$$

The water splitting ( $\text{H}_2$  and  $\text{O}_2$  gases evolution) was measured using a specially designed PEC three-electrode reactor. Three electrodes, namely the working electrode as a photoanode, the counter electrode as Pt wire, the and reference electrode as Hg/HgO electrodes were mounted in an airtight glass reactor that contained a quartz-glass window to allow light

illumination without any obstacle. An aqueous solution of 1 M NaOH of pH 13.6 was filled in a reactor as an electrolyte, and before the reaction started, the reactor was purged with N<sub>2</sub> gas (99.9%) for 1.5 h to remove dissolved oxygen. The amounts of H<sub>2</sub> and O<sub>2</sub> evolved were measured using a gas chromatography (GC) system equipped with a thermal conductivity detector (GC-TCD, Agilent 7820, USA) and a 5 Å molecular sieve column under 1-sun illumination (AM 1.5G, 100 mW/cm<sup>2</sup>) condition at 1.23 V<sub>RHE</sub>.

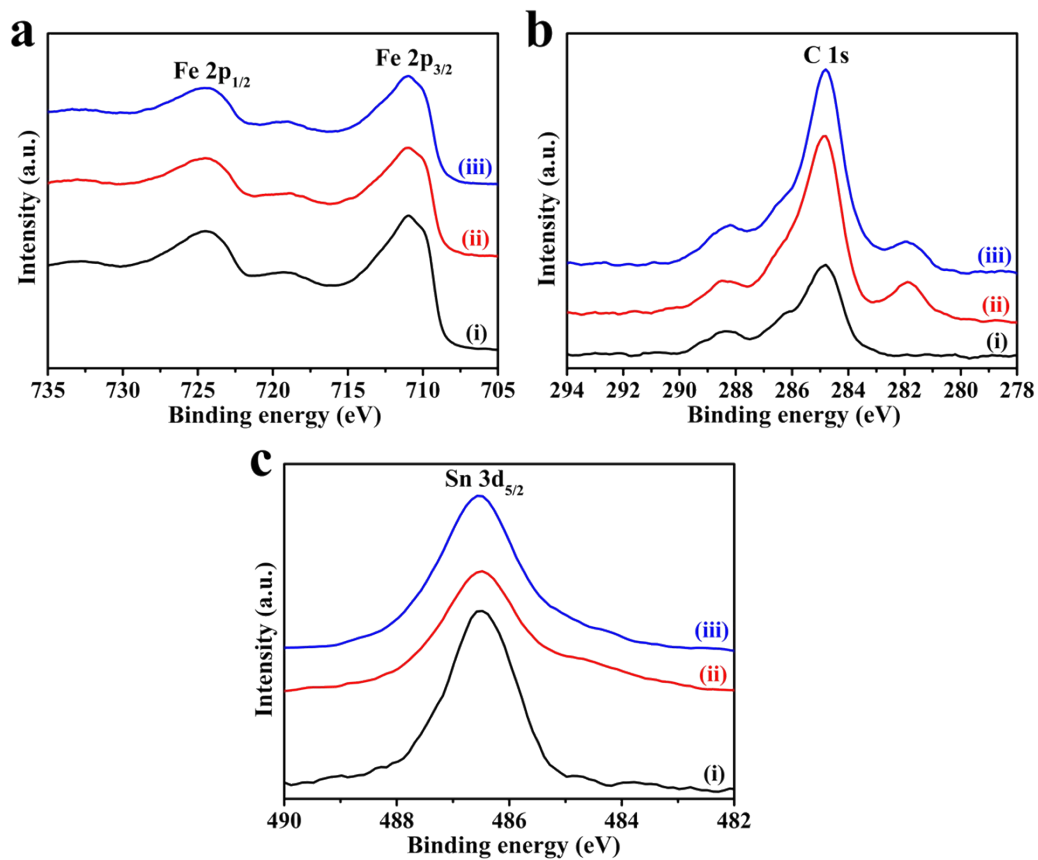

**Fig. S1.** XPS spectra of (a) Fe 2p, (b) C 1s and (c) Sn 3d of (i) Zr-HT, (ii) Zr-HT/Ru-FeOOH, and (iii) Zr-HT/Ru-FeOOH/FNH photoanodes.

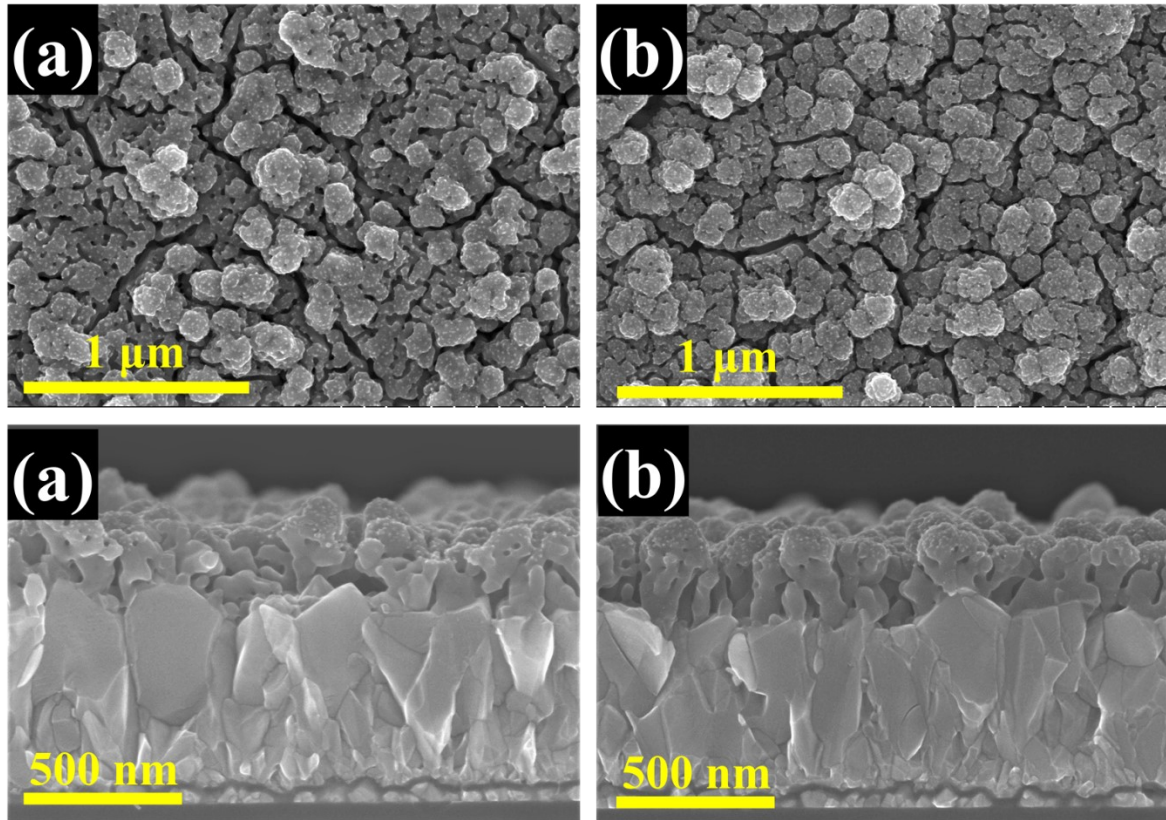

**Fig. S2.** HR FE-SEM top and cross-sectional images of (a) Zr-HT and (b) Zr-HT/Ru-FeOOH photoanodes.

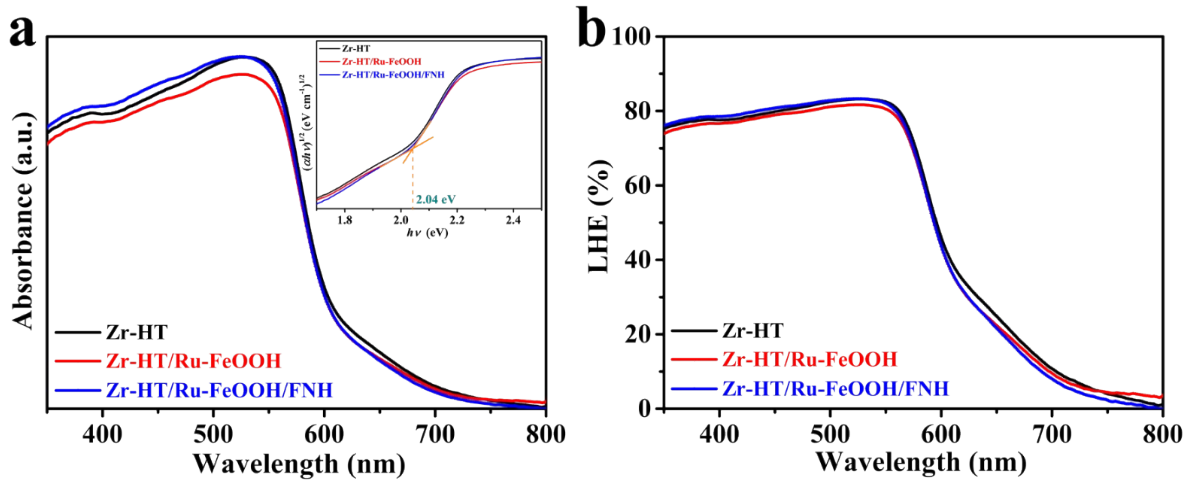

**Fig. S3.** (a) UV-Vis absorbance spectroscopy (inset: Tauc plots) and (b) LHE graphs of Zr-HT, Zr-HT/Ru-FeOOH, and Zr-HT/Ru-FeOOH/FNH photoanodes.

The optical properties of the as-prepared photoanodes were evaluated by ultraviolet-visible absorption spectra using a UV-Vis spectrophotometer (UV-2600, Shimadzu). The bandgap of the photoanode was determined from an indirect transition of the Tauc method:

$$(\alpha h\nu)^{1/n} = A(h\nu - E_g) \quad (\text{S6})$$

where,  $\alpha$  is the absorption coefficient,  $h$  is Planck's constant,  $\nu$  is the photon frequency,  $A$  is a proportionality constant,  $E_g$  is the optical band gap, and  $n$  is an exponent that depends on the nature of the electronic transitions. Since hematite is an indirect bandgap semiconductor, the value of  $1/n$  is  $1/2$ .

The light harvesting efficiency (LHE; defined as the ratio of absorbed light to the incident light) of each photoanode can be calculated from the UV-Vis absorbance spectra:<sup>4</sup>

$$LHE = 1 - 10^{-A(\lambda)} \quad (\text{S7})$$

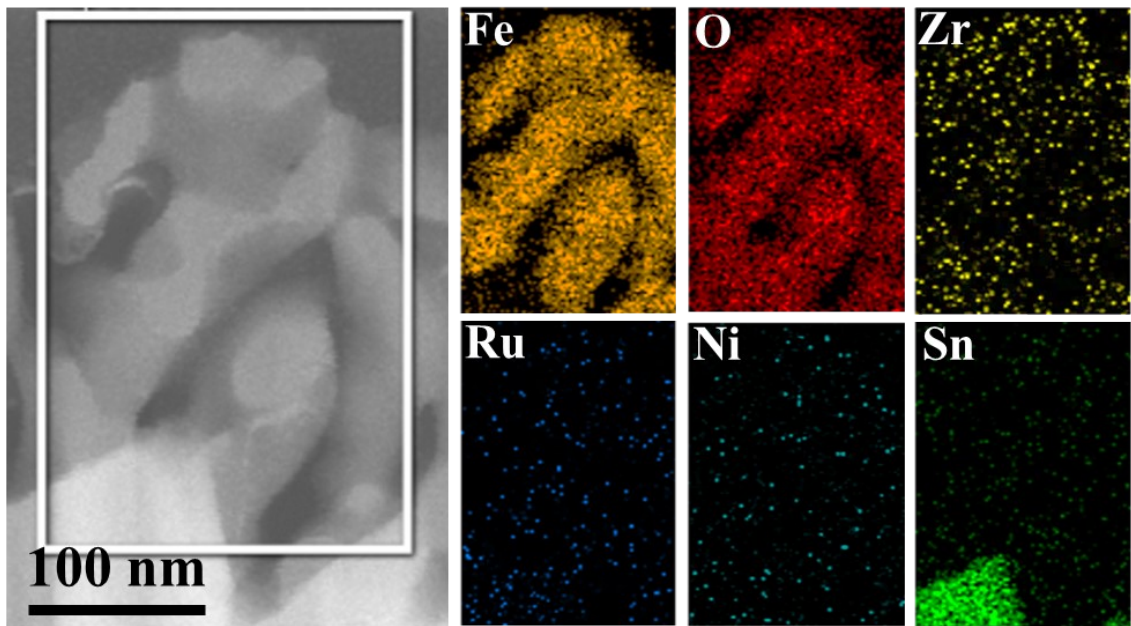

**Fig. S4.** EDS mapping of Zr-HT/Ru-FeOOH/FNH photoanode.



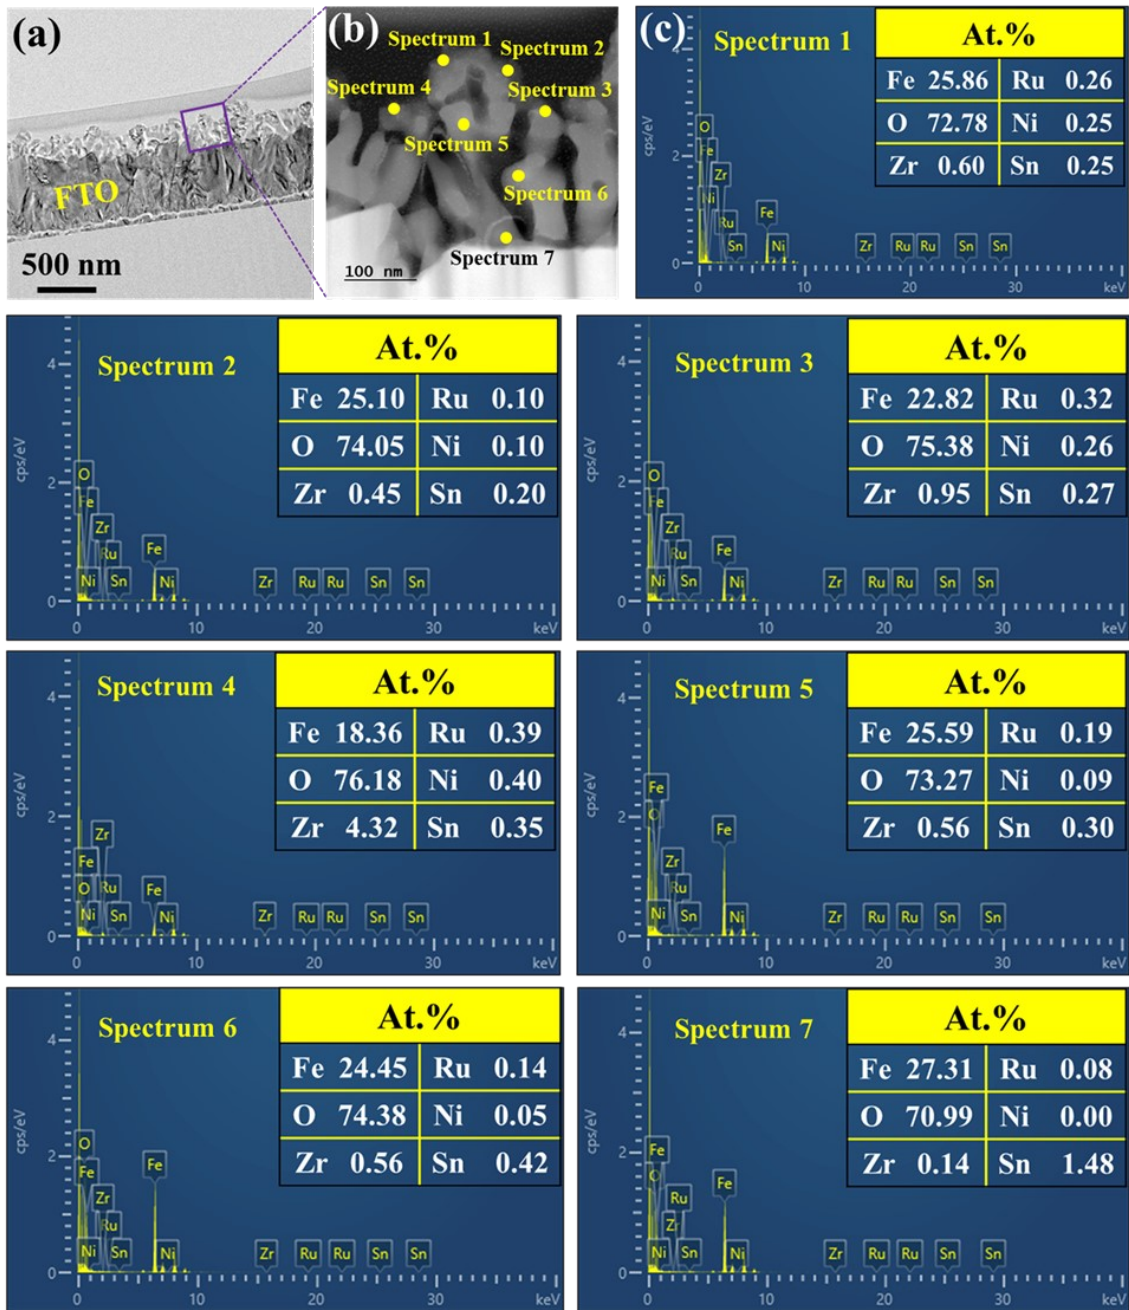

**Fig. S5.** (a) Low magnification TEM image, (b) Cross-sectional TEM image of Zr-HT/Ru-FeOOH/FNH photoanode and (c) respective EDS point spectra.

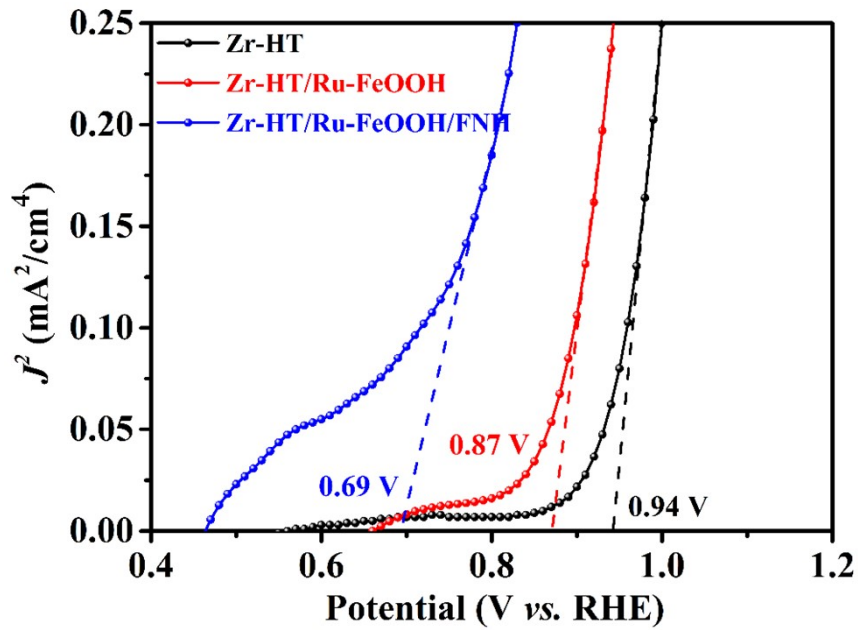

Fig. S6. Butler plots of Zr-HT, Zr-HT/Ru-FeOOH and Zr-HT/Ru-FeOOH/FNH photoanodes.

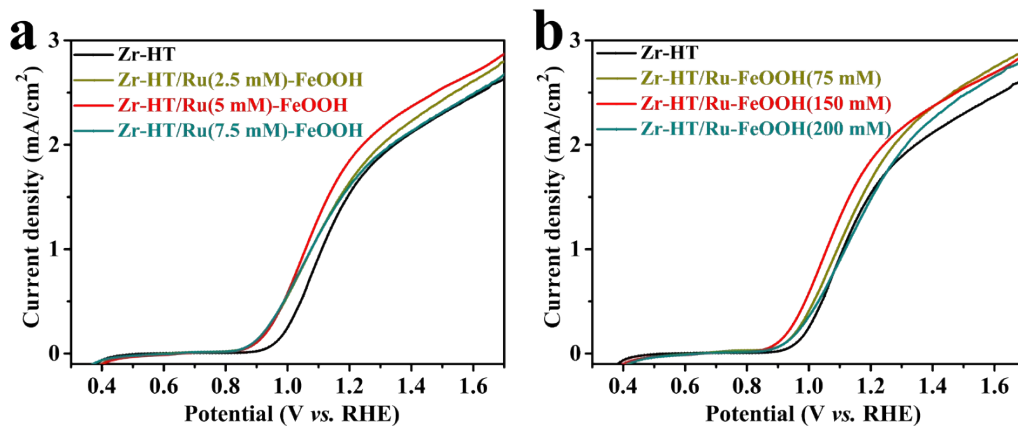

Fig. S7.  $J$ - $V$  graphs of Zr-HT and Zr-HT/Ru-FeOOH with respect to (a) different Ru concentrations with 150 mM Fe and (b) various Fe concentrations with 5 mM Ru under 1-sun illumination in 1 M NaOH electrolyte.

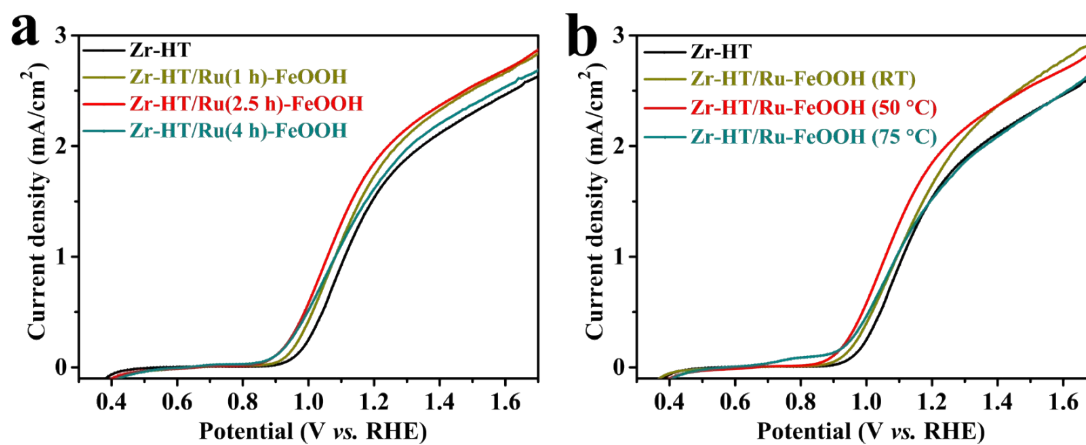

**Fig. S8.**  $J$ - $V$  graphs of Zr-HT and Zr-HT/Ru-FeOOH with respect to different Ru-FeOOH hydrothermal (a) time at 50 °C and (b) different hydrothermal temperatures for 2.5 h under 1-sun illumination in 1 M NaOH electrolyte.

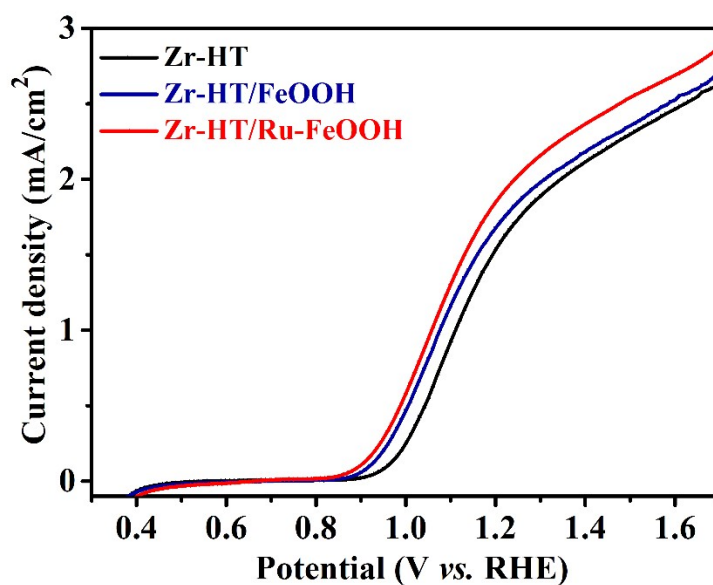

**Fig. S9.**  $J$ - $V$  graphs of Zr-HT, Zr-HT/FeOOH and Zr-HT/Ru-FeOOH, photoanodes.

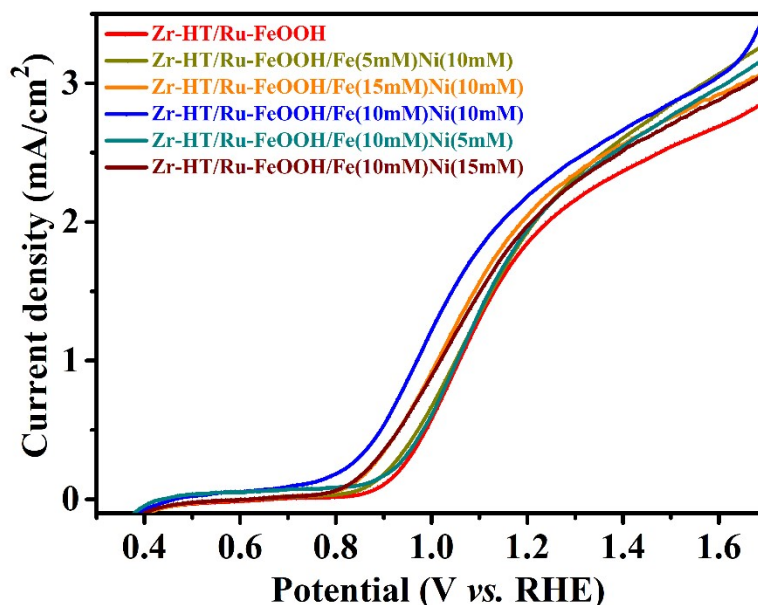

**Fig. S10.**  $J$ - $V$  graphs of Zr-HT/Ru-FeOOH and Zr-HT/Ru-FeOOH/FNH with respect to different concentrations of FeCl<sub>3</sub>·6H<sub>2</sub>O (5, 10 and 15 mM) and Ni(NO<sub>3</sub>)<sub>2</sub>·6H<sub>2</sub>O (5, 10 and 15 mM) under 1-sun illumination in 1 M NaOH electrolyte.

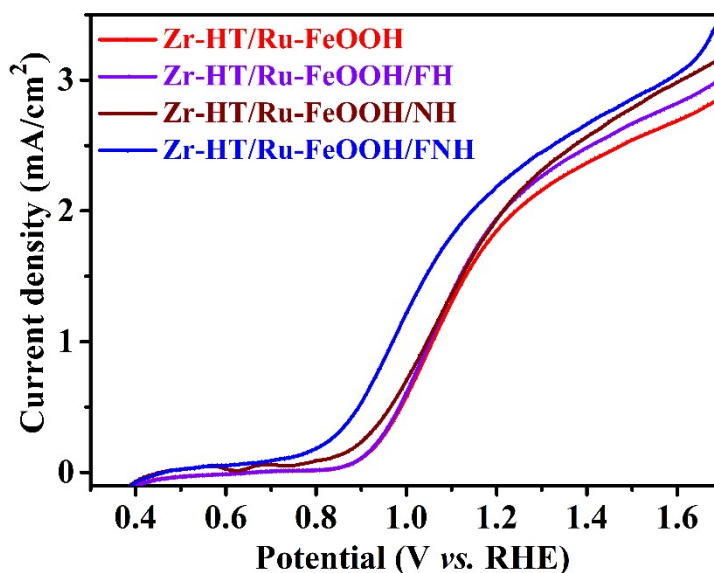

**Fig. S11.**  $J$ - $V$  graphs of Zr-HT/Ru-FeOOH, Zr-HT/Ru-FeOOH/FH, Zr-HT/Ru-FeOOH/NH and Zr-HT/Ru-FeOOH/FNH photoanodes.

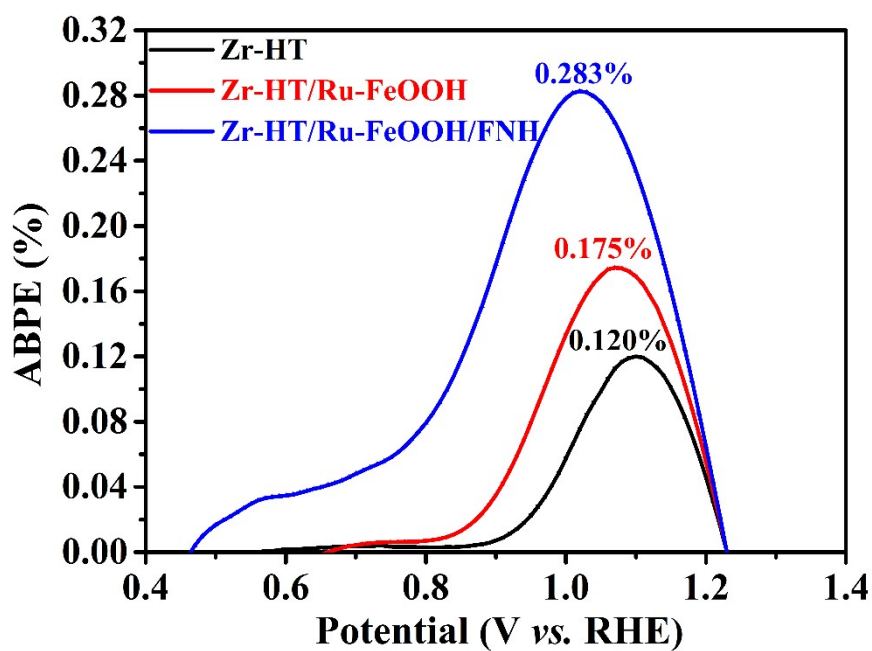

**Fig. S12.** ABPE plots of Zr-HT, Zr-HT/Ru-FeOOH, and Zr-HT/Ru-FeOOH/FNH photoanodes.

The applied bias photon-to-current efficiency (ABPE) was calculated using the following equation:

$$ABPE (\%) = J_{ph} \times [(1.23 - V)/P] \times 100 \quad (S8)$$

where,  $J_{ph}$  is the photocurrent density ( $\text{mA}/\text{cm}^2$ ),  $V$  is the applied potential of the working electrode under illumination vs. RHE and  $P$  is the incident light intensity of the solar simulator ( $100 \text{ mW}/\text{cm}^2$ ).

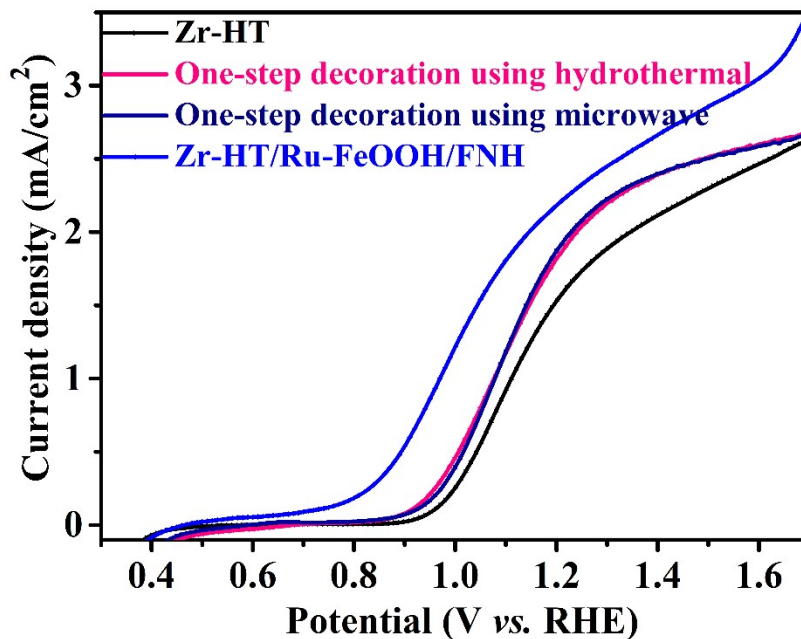

**Fig. S13.** Photocurrent density-potential ( $J$ - $V$ ) curves under 1-sun illumination of Zr-HT, a complex of Ru-FeOOH and FeNi(OH)<sub>x</sub> one-step deposition using hydrothermal and microwave, and Zr-HT/Ru-FeOOH/FNH photoanodes.

As shown in Fig. S13, Ru-FeOOH and FeNi(OH)<sub>x</sub> one-step deposition on Zr-HT photoanode via hydrothermal and microwave approaches reached the photocurrent density of 1.96 mA/cm<sup>2</sup> and 2.0 mA/cm<sup>2</sup>, respectively, at 1.23 V<sub>RHE</sub>. These photocurrents are significantly lower than that of dual-layer cocatalyst samples (Zr-HT/Ru-FeOOH/FNH). Besides, these photoanodes exhibited a marginal cathodic onset shifting as compared to Zr-HT. From this observation, we can conclude that the two-step cocatalyst modification is preferable for effective PEC water oxidation than the one-step cocatalyst decoration.

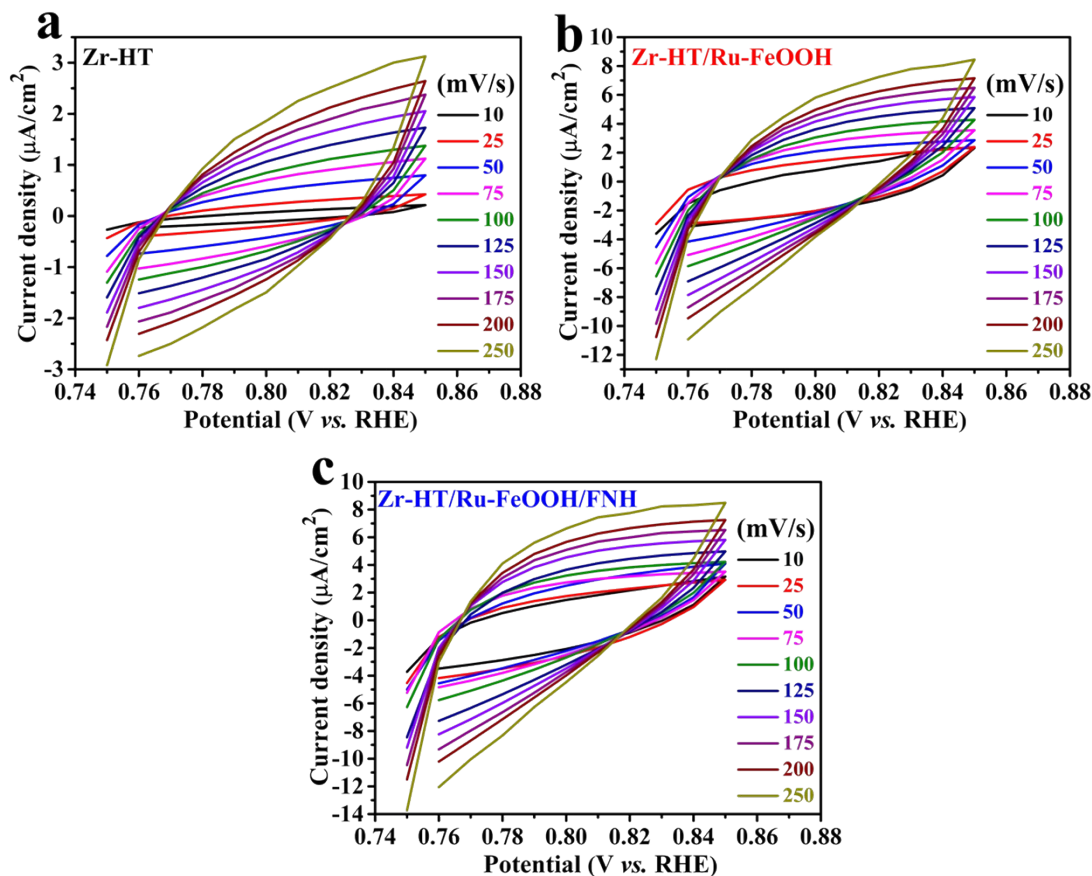

**Fig. S14.** CV were obtained in the non-faradaic potential region of 0.75–0.85  $V_{\text{RHE}}$  at various scan rates ranging from 10 to 250 mV/s for (a) Zr-HT, (b) Zr-HT/Ru-FeOOH and (c) Zr-HT/Ru-FeOOH/FNH photoanodes using 1 M NaOH electrolyte.

The electrochemically active surface area (ECSA) was determined using double-layer capacitance ( $C_{\text{dl}}$ ) measurements at 10 different scan rates (10, 25, 50, 75, 100, 125, 150, 175, 200 and 250 mV/s) in the non-faradaic region of 0.75–0.85  $V_{\text{RHE}}$  by using cyclic voltammograms (Fig. S14). The  $C_{\text{dl}}$  values were evaluated by plotting the corresponding absolute current vs. scan rate plot obtained at 0.80  $V_{\text{RHE}}$ . The slopes of the fitting line can be used to estimate the  $C_{\text{dl}}$  of the as-prepared photoanodes, as the slope is twice the  $C_{\text{dl}}$ . The ECSA was then computed using the following formula based on the obtained  $C_{\text{dl}}$  values:<sup>6</sup>

$$ECSA = \frac{C_{\text{dl}}}{C_s} \quad (\text{S9})$$

where,  $C_s$  is the specific capacitance of the sample, which is 40  $\mu\text{F}/\text{cm}^2$  in 1 M NaOH electrolyte.

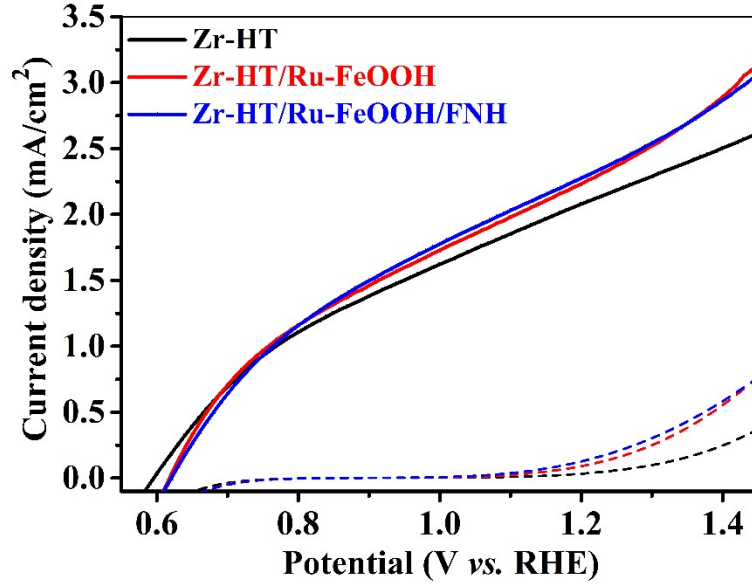

**Fig. S15.**  $J$ - $V$  plots of Zr-HT, Zr-HT/Ru-FeOOH, and Zr-HT/Ru-FeOOH/FNH photoanodes in 0.5 M  $\text{H}_2\text{O}_2$  + 1 M NaOH electrolyte under 1-sun illumination and dark condition (dashed lines).

The bulk charge separation efficiency ( $\eta_{\text{bulk}}$ ) and surface charge separation efficiency ( $\eta_{\text{surface}}$ ) of as-synthesized photoanodes were measured by the addition of 0.5 M  $\text{H}_2\text{O}_2$  in 1 M NaOH electrolyte solution. The  $\eta_{\text{bulk}}$  and  $\eta_{\text{surface}}$  were calculated by the following equations:<sup>7</sup>

$$\eta_{\text{bulk}} = J_{\text{H}_2\text{O}_2} / J_{\text{abs}} \times 100 \quad (\text{S10})$$

$$\eta_{\text{surface}} = J_{\text{H}_2\text{O}} / J_{\text{H}_2\text{O}_2} \times 100 \quad (\text{S11})$$

where,  $J_{\text{H}_2\text{O}}$  is the measured photocurrent density,  $J_{\text{abs}}$  is the photon absorption expressed as a current density (i.e., absorbed photon-to-current efficiency APCE =100%), and  $J_{\text{H}_2\text{O}_2}$  is the photocurrent density in the presence of  $\text{H}_2\text{O}_2$ .



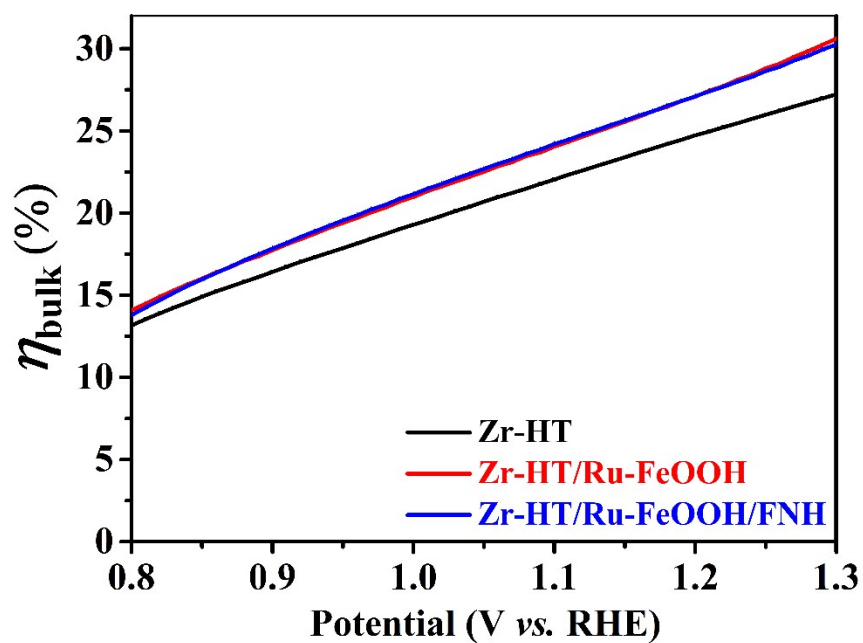

**Fig. S16.** Bulk charge separation efficiencies of Zr-HT, Zr-HT/Ru-FeOOH, and Zr-HT/Ru-FeOOH/FNH photoanodes.

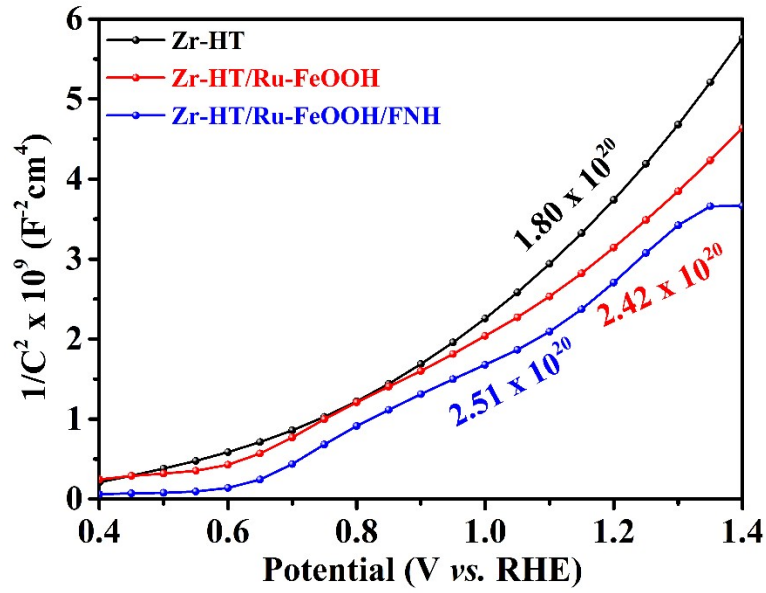

**Fig. S17.** Mott-Schottky plots under dark conditions for Zr-HT, Zr-HT/Ru-FeOOH, and Zr-HT/Ru-FeOOH/FNH photoanodes.

The Mott-Schottky plots were measured in dark conditions at a frequency of 100 Hz to understand the donor density ( $N_D$ ) and flat band potential based on the following equation:<sup>8</sup>

$$\frac{1}{C^2} = \frac{2}{q\epsilon\epsilon_0 N_D A^2} (V - E_{FB} - k_B T/q) \quad (\text{S12})$$

where,  $q$  is the electron charge ( $1.602 \times 10^{-19}$  C),  $\epsilon$  is the dielectric constant of hematite (80),  $\epsilon_0$  is the permittivity of vacuum ( $8.854 \times 10^{-12}$  F m<sup>-1</sup>),  $E_{FB}$  is the flat band potential,  $k_B$  is the Boltzmann constant ( $1.38 \times 10^{-23}$  J K<sup>-1</sup>),  $T$  is the temperature and  $C$  is the capacitance derived from the electrochemical impedance obtained at each potential (V).

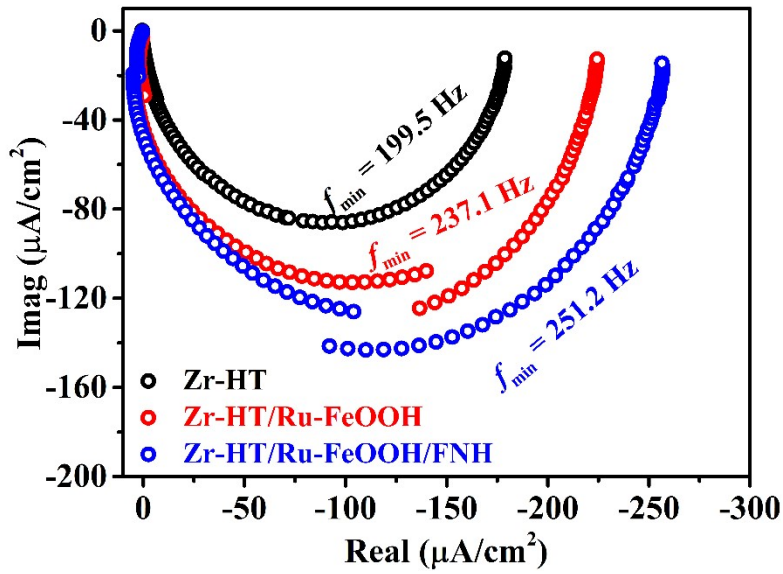

**Fig. S18.** IMPS plots at 1.23 V<sub>RHE</sub> for Zr-HT, Zr-HT/Ru-FeOOH, and Zr-HT/Ru-FeOOH/FNH photoanodes.

The intensity-modulated photocurrent spectroscopy (IMPS) study was performed using a blue LED by a frequency-response analyzer with a peak wavelength of 460 nm. The average transport time of the photogenerated electron ( $\tau_{et}$ ) can be calculated from the angular frequency of the minimum given by the following equation:<sup>9</sup>

$$\tau_{et} = (2\pi f_{min})^{-1} \quad (\text{S13})$$

where,  $f_{min}$  is the frequency at the minimum imaginary component in the IMPS semicircle.

**Table S1.** Frequency at the minimum imaginary component ( $f_{min}$ ) and average electron transport time ( $\tau_{et}$ ) in the IMPS spectra for Zr-HT, Zr-HT/Ru-FeOOH, and Zr-HT/Ru-FeOOH/FNH photoanodes at 1.23 V vs. RHE.

| Samples            | $f_{min}$ (Hz) | $\tau_{et}$ (ms) |
|--------------------|----------------|------------------|
| Zr-HT              | 199.5          | 0.79             |
| Zr-HT/Ru-FeOOH     | 237.1          | 0.67             |
| Zr-HT/Ru-FeOOH/FNH | 251.2          | 0.63             |

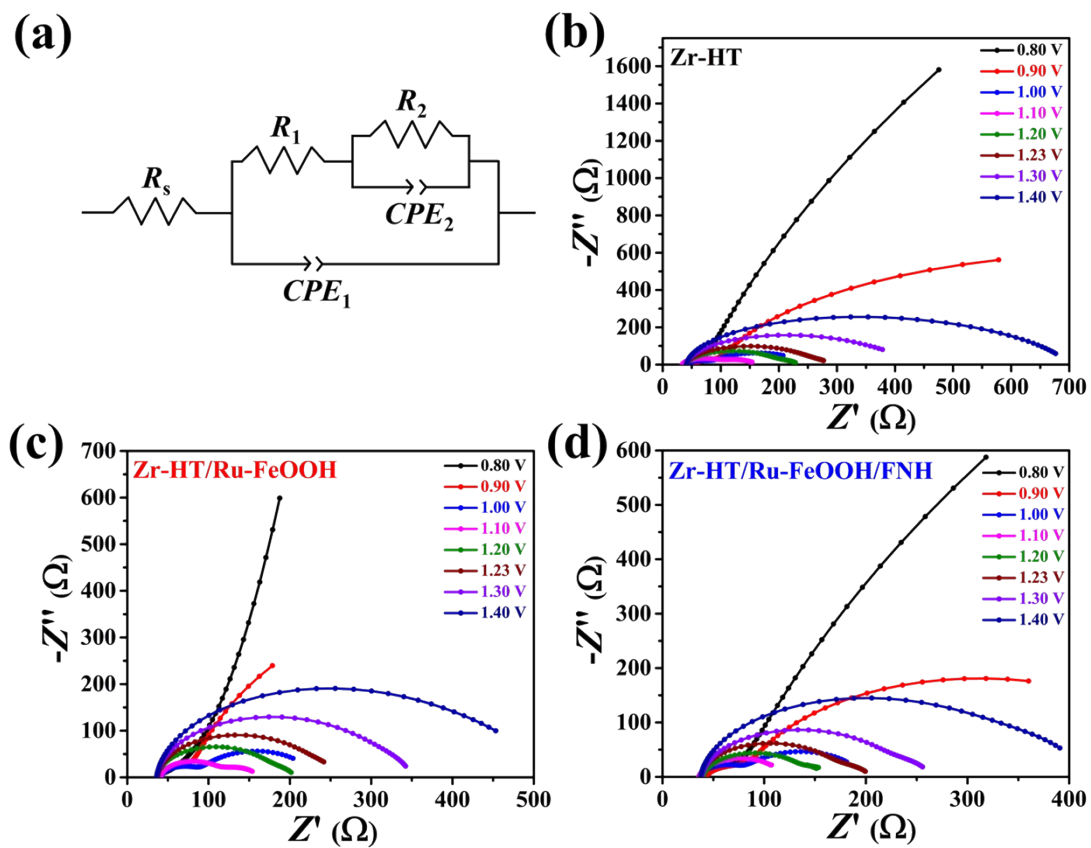

**Fig. S19.** (a) Nyquist plots fitted circuit model, EIS curves of (b) Zr-HT, (c) Zr-HT/Ru-FeOOH, and (d) Zr-HT/Ru-FeOOH/FNH photoanodes at various potentials.

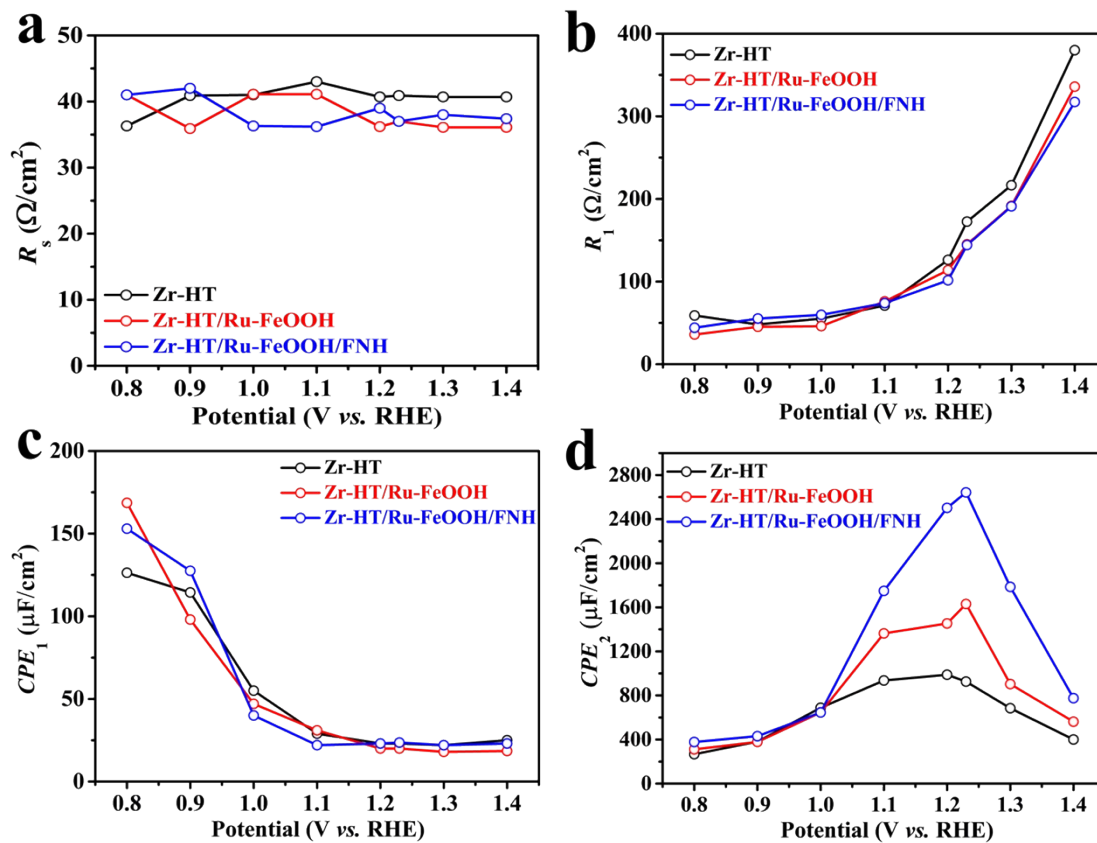

**Fig. S20.** (a)  $R_s$ , (b)  $R_1$ , (c)  $CPE_1$  and (d)  $CPE_2$  values of Zr-HT, Zr-HT/Ru-FeOOH, and Zr-HT/Ru-FeOOH/FNH photoanodes at various potentials.

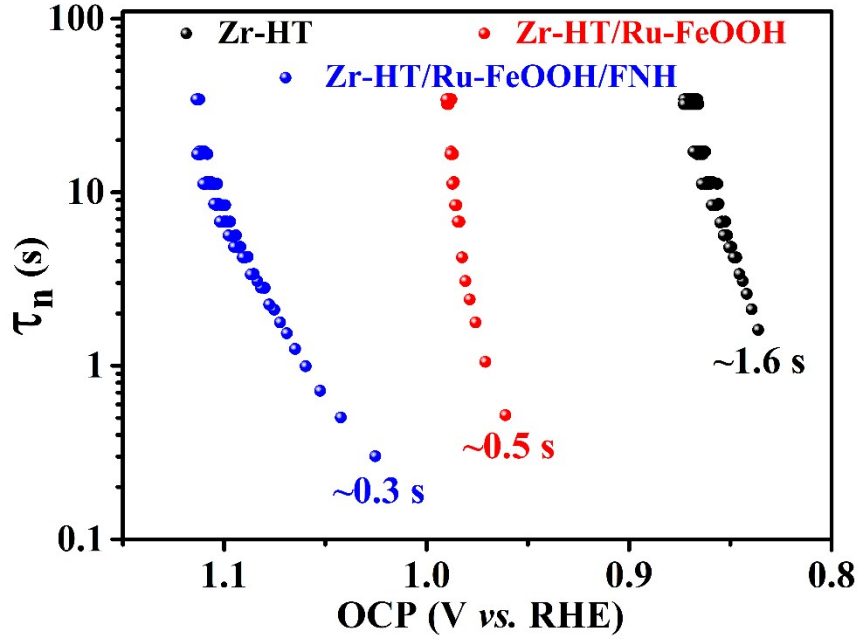

**Fig. S21.** Potential dependent carrier lifetime for Zr-HT, Zr-HT/Ru-FeOOH and Zr-HT/Ru-FeOOH/FNH photoanodes at various potentials.

The carrier lifetime of the photogenerated charges ( $\tau_n$ ) as a function of OCP was evaluated using the following equation:<sup>10</sup>

$$\tau_n = \frac{k_B T}{e} \left( \frac{dOCP}{dt} \right)^{-1} \quad (S14)$$

where,  $k_B$ ,  $T$ ,  $e$  and  $dOCP/dt$  are Boltzmann's constant, Kelvin temperature, a charge of the electron and derivative of the OCP transient decay, respectively.

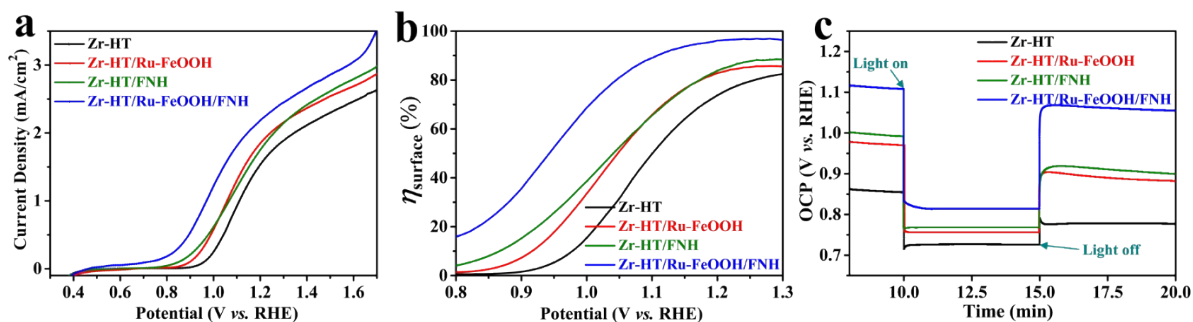

**Fig. S22.** (a)  $J-V$  graphs, (b)  $\eta_{\text{surface}}$  and (c) OCP plots of Zr-HT, Zr-HT/Ru-FeOOH, Zr-HT/FNH and Zr-HT/Ru-FeOOH/FNH photoanodes.

Ru-FeOOH and FeNi(OH)<sub>x</sub> dual-cocatalyst layer deposited on Zr-Fe<sub>2</sub>O<sub>3</sub> photoanode exhibited enhanced PEC activity than only FeNi(OH)<sub>x</sub> coated Zr-Fe<sub>2</sub>O<sub>3</sub> photoanode. This can be attributed to the intermediate Ru-FeOOH layer facilitating the surface charge separation and thereby hastening the hole transfer to the surface of the photoanode via FeNi(OH)<sub>x</sub> layer. This observation was further evidenced by the surface charge separation efficiency (Fig. S22b). Moreover, the cathodic OCP<sub>dark</sub> value of the Zr-HT/FNH photoanode compared to that of Zr-HT/Ru-FeOOH/FNH further corroborated the existence of Fermi level pinning effect in Zr-HT/FNH photoanode (Fig. S22c), which restricted the effective charge separation and charge transfer.

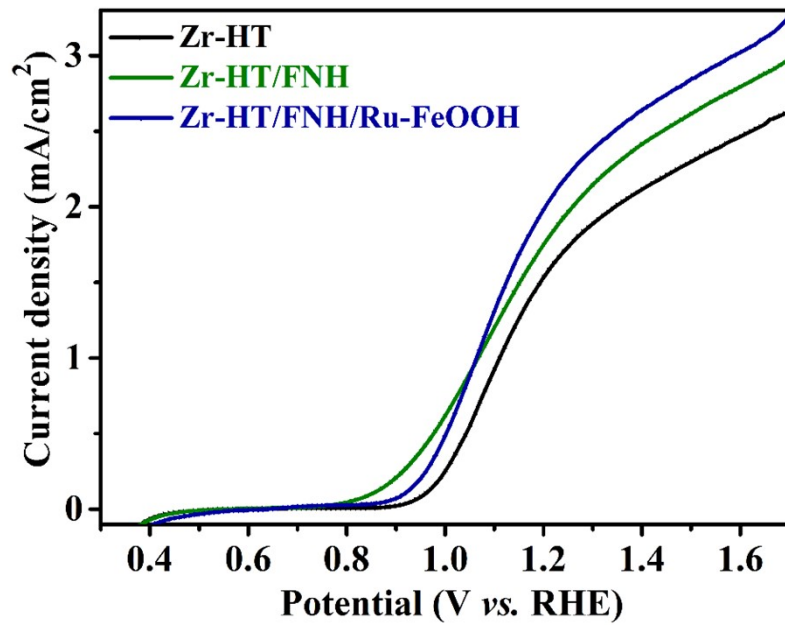

Fig. S23.  $J$ - $V$  graphs of Zr-HT, Zr-HT/FNH and Zr-HT/FNH/Ru-FeOOH photoanodes.

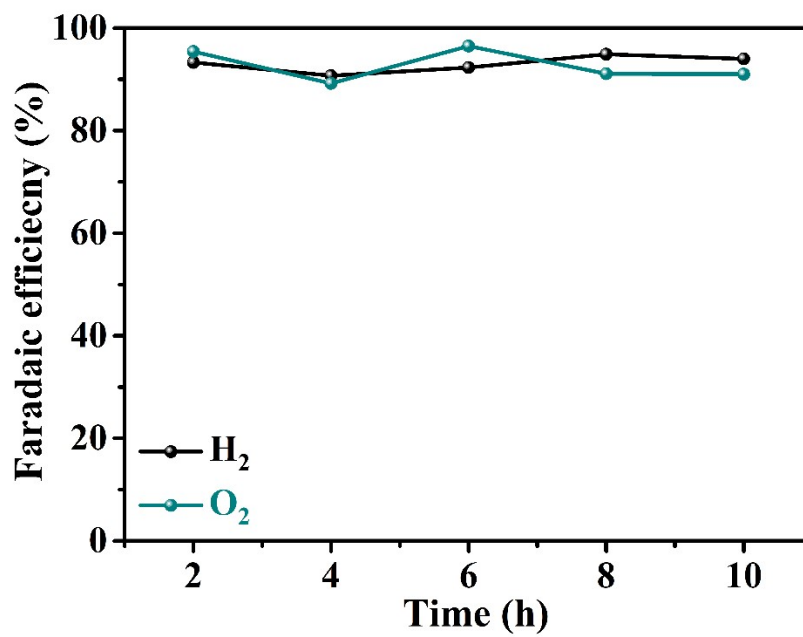

Fig. S24. Faradaic efficiencies of Zr-HT/Ru-FeOOH/FNH photoanode.



The corresponding OER steps in alkaline solution are described as below:

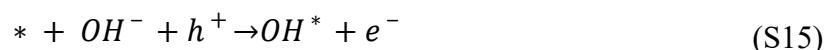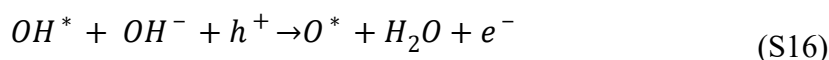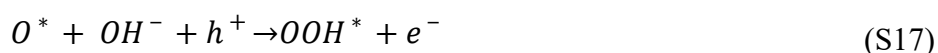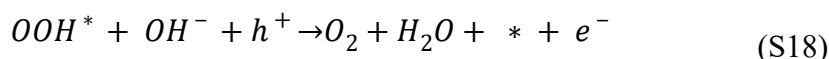

where, \* represents the surface-active sites (metal active sites), and OH\*, O\* and OOH\* are the reaction intermediates.

## References

1. J. B. Hwang, M. A. Mahadik, P. Anushkaran, S. H. Choi, W. S. Chae, H. H. Lee and J. S. Jang, *Appl. Surf. Sci.*, 2022, **596**, 153609.
2. M. A. Gaikwad, U. V. Ghorpade, U. P. Suryawanshi, P. V. Kumar, S. Jang, J. S. Jang, L. Tran, J. S. Lee, H. Bae, S. W. Shin and M. P. Suryawanshi, *ACS Appl. Mater. Interfaces*, 2023, **5**, 21123–21133.
3. T. Shen, J. Tian, L. Lv, C. Fei, Y. Wang, T. Pullerits and G. Cao, *Electrochim. Acta*, 2016, **191**, 62–69.
4. J. Huang, G. Hu, Y. Ding, M. Pang and B. Ma, *J. Catal.*, 2016, **340**, 261–269.
5. P. Anushkaran, T. S. Koh, W. S. Chae, H. H. Lee, S. H. Choi and J. S. Jang, *ACS Sustain. Chem. Eng.*, 2023, **11**, 5895–5907.
6. L. Mao, H. Deng, M. Li and S. Shen, *Sci. China Mater.*, 2023, **66**, 603–613.
7. J. Xiao, C. Li, X. Jia, B. Du, R. Li and B. Wang, *J. Colloid Interface Sci.*, 2022, **633**, 555–565.
8. B. Lei, D. Xu, B. Wei, T. Xie, C. Xiao, W. Ji and L. Xu, *ACS Appl. Mater. Interfaces*, 2021, **13**, 4785–4795.
9. I. S. Hwang, M. A. Mahadik, M. S. Song, S. W. Lee, B. T. Oh, H. H. Lee, W. S. Chae, S. H. Choi and J. S. Jang, *J. Environ. Chem. Eng.*, 2023, **11**, 109985.
10. R. Chong, Z. Wang, J. Lv, J. Rong, L. Zhang, Y. Jia, L. Wang, Z. Chang and X. Wang, *J. Catal.*, 2021, **399**, 170–181.
